# Supplementary material
Source: MDPI journal article supplement (https://www.mdpi.com/search?q=metabolites-11-00144)
Supplement: s001 [file metabolites-11-00144-s001.pdf]

# Metabolite structure assignment of seized products containing cathinone derivatives through high resolution analytical techniques

João L. Gonçalves, Vera L. Alves, Joselin Aguiar, Maria J. Caldeira, Helena M. Teixeira, José S. Câmara\*

\*CQM - Centro de Química da Madeira, Universidade da Madeira, Campus Universitário da Penteada, 9020-105 Funchal, Portugal.

## Supporting Information

### Table of Contents

---

- Figure S1. FTIR spectra of seized products suspected to contain SCat
- Figure S2. Typical GC-MS chromatograms of seized products suspected to contain SCat
- Figure S3. Typical GC-MS chromatograms of seized products after derivatization with TFAA
- Figure S4.  $^1\text{H}$  NMR spectra of seized products
- Figure S5.  $^{13}\text{C}$  NMR spectra of seized products
- Figure S6.  $^1\text{H}$ - $^1\text{H}$  COSY NMR spectra of MPHP and  $\alpha$ -PHP found in products 1 and 2, respectively
- Figure S7.  $^1\text{H}$ - $^{13}\text{C}$  HSQC and HMBC NMR spectra of MPHP found in product 1
- Figure S8.  $^1\text{H}$ - $^{13}\text{C}$  HSQC and HMBC NMR spectra of  $\alpha$ -PHP found in product 2
- Figure S9. FTIR spectra of the insoluble substance found in product 10
- Table S1.  $^1\text{H}$  and  $^{13}\text{C}$  NMR assignments of adulterants found in seized materials
-

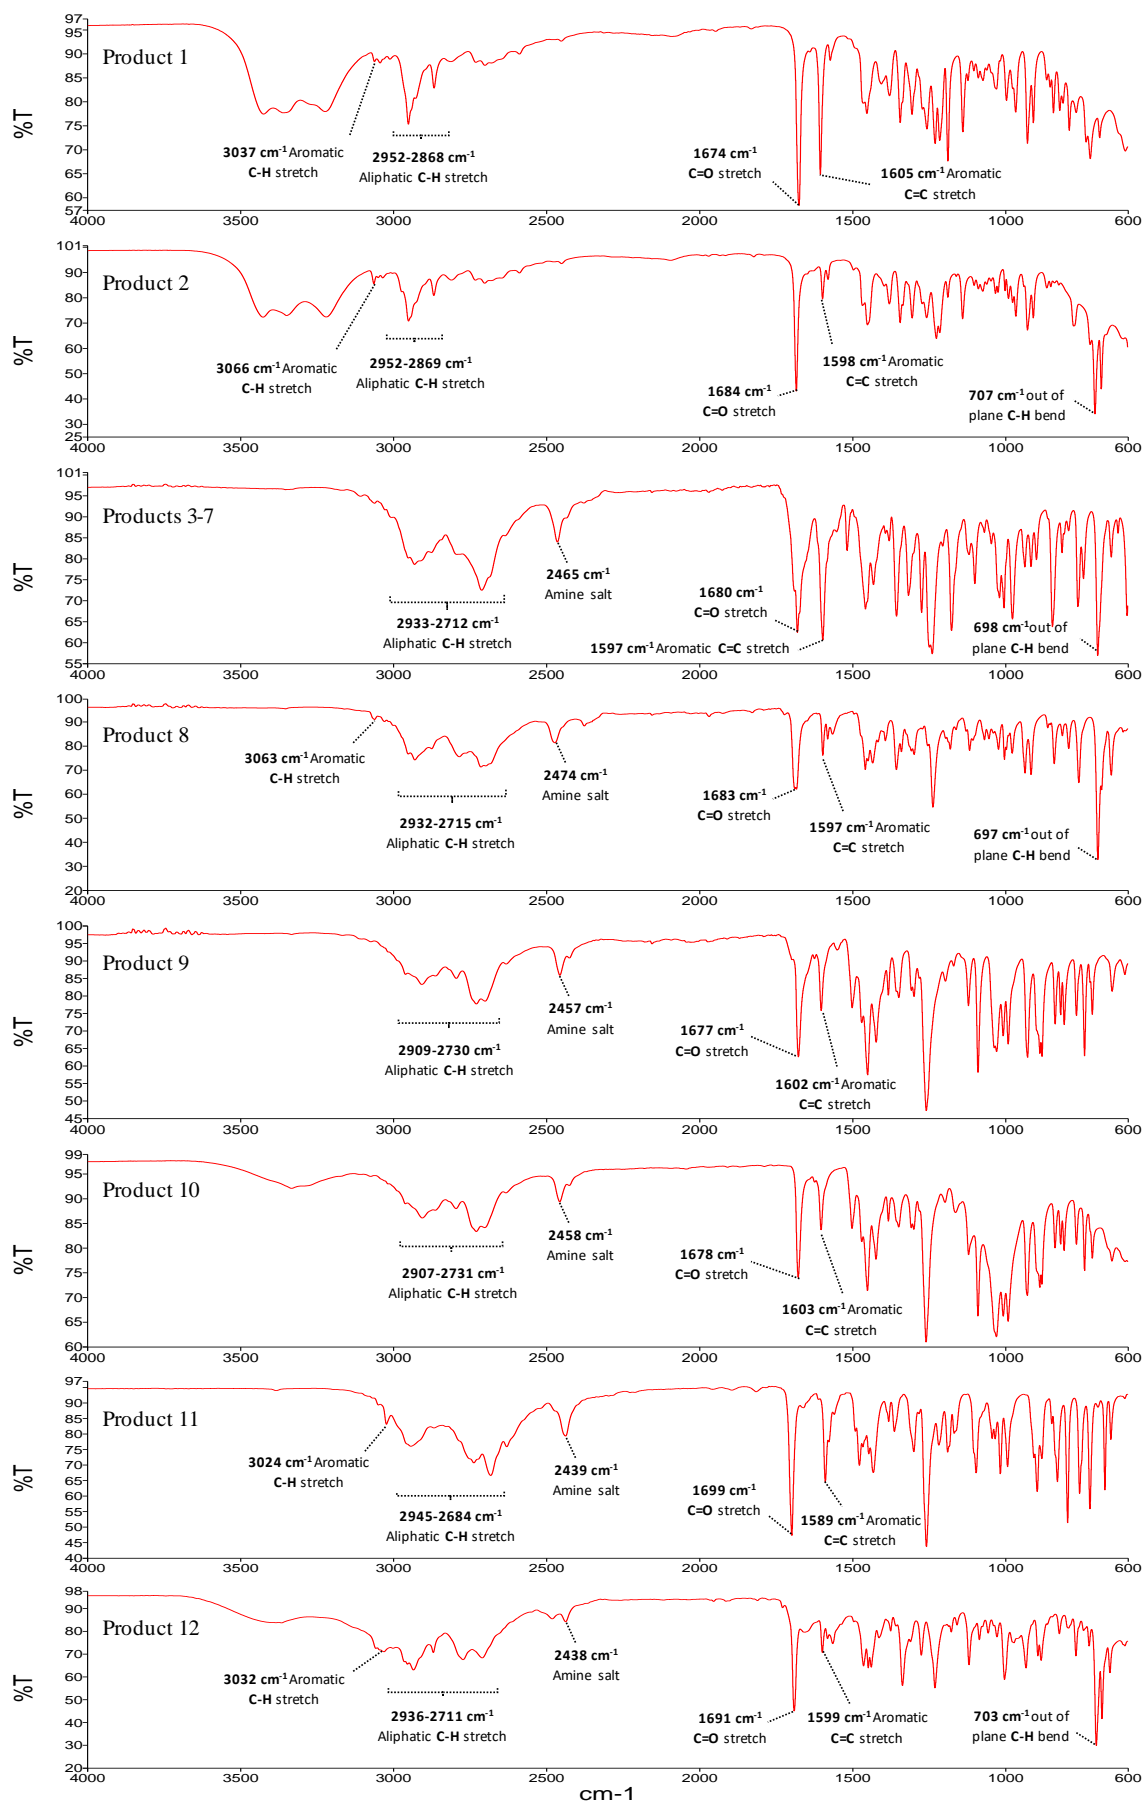

**Figure S1.** FTIR spectra of seized products suspected to contain SCat. Products 3-7 show similar infrared spectra.

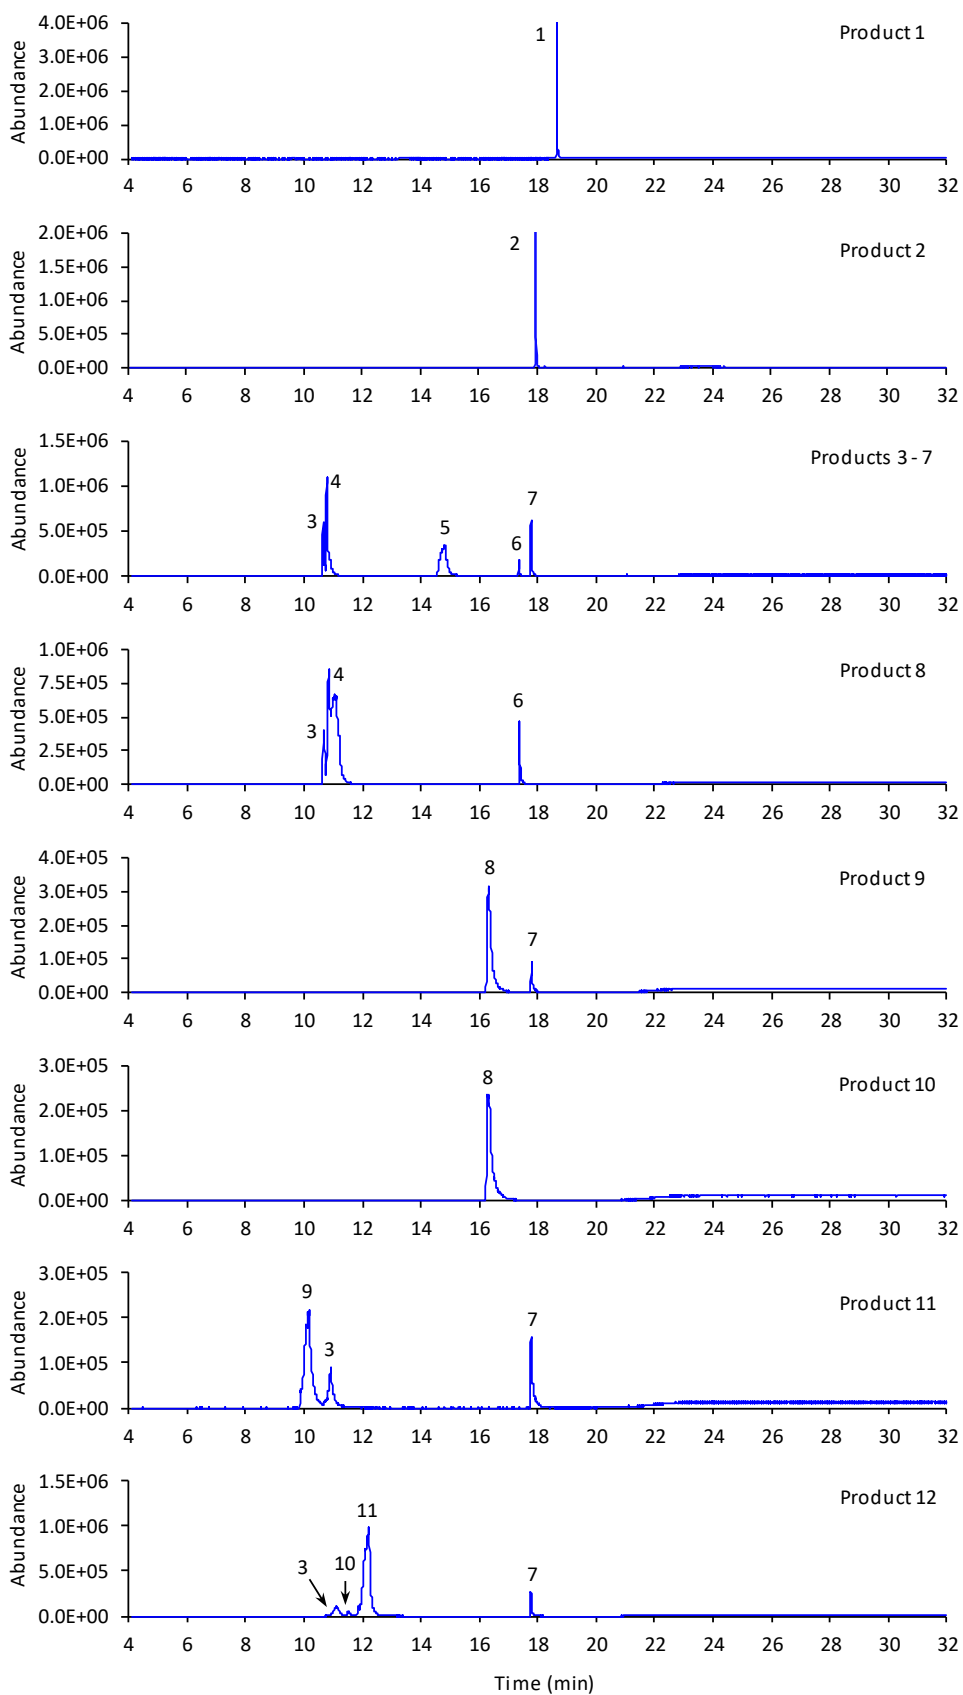

**Figure S2.** Typical GC-MS chromatograms of seized products suspected to contain SCat. Products 3-7 show similar chromatographic profiles. Peak identification: (1) MPHP, (2)  $\alpha$ -PHP, (3) *N*-ethylcathinone, (4) buphedrone, (5) methedrone, (6) ethylphenidate, (7) caffeine, (8) methylone, (9) 3-FMC, (10) Isopentredone and (11) pentredone.

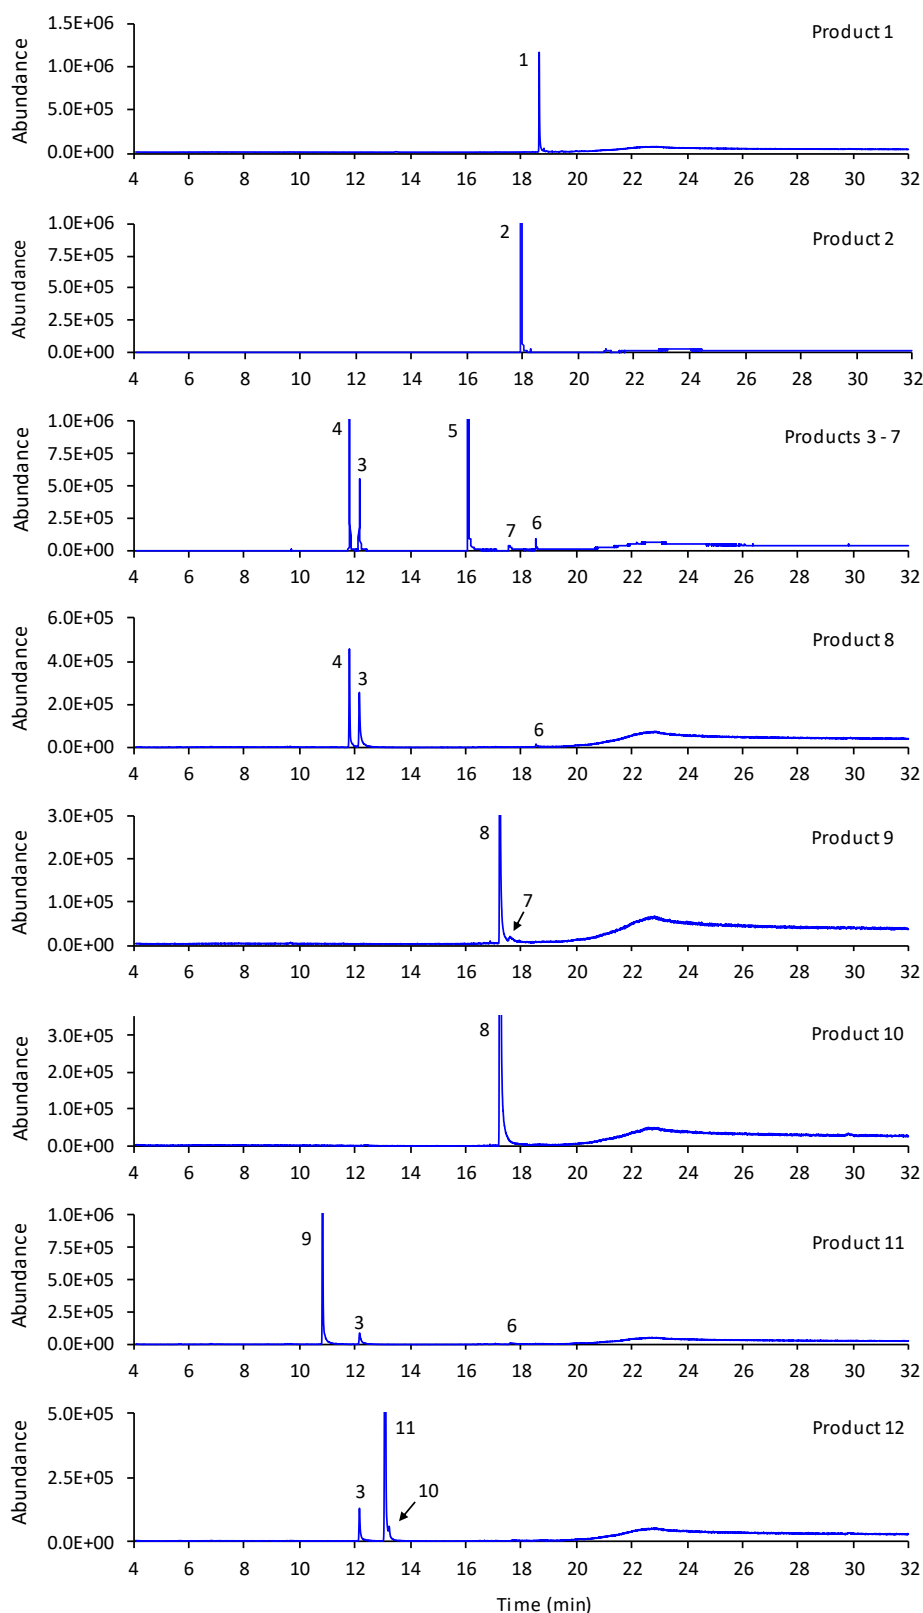

**Figure S3.** Typical GC-MS chromatograms of seized products after derivatization with TFAA. Products 3-7 show similar chromatographic profiles. Peak identification: (1) MPHP, (2)  $\alpha$ -PHP, (3) *N*-ethcathinone-TFA derivative, (4) buphedrone-TFA derivative, (5) methedrone-TFA derivative, (6) ethylphenidate-TFA derivative, (7) caffeine, (8) methylone-TFA derivative, (9) 3-FMC-TFA derivative, (10) Isopentredone-TFA derivative and (11) pentedrone-TFA derivative.

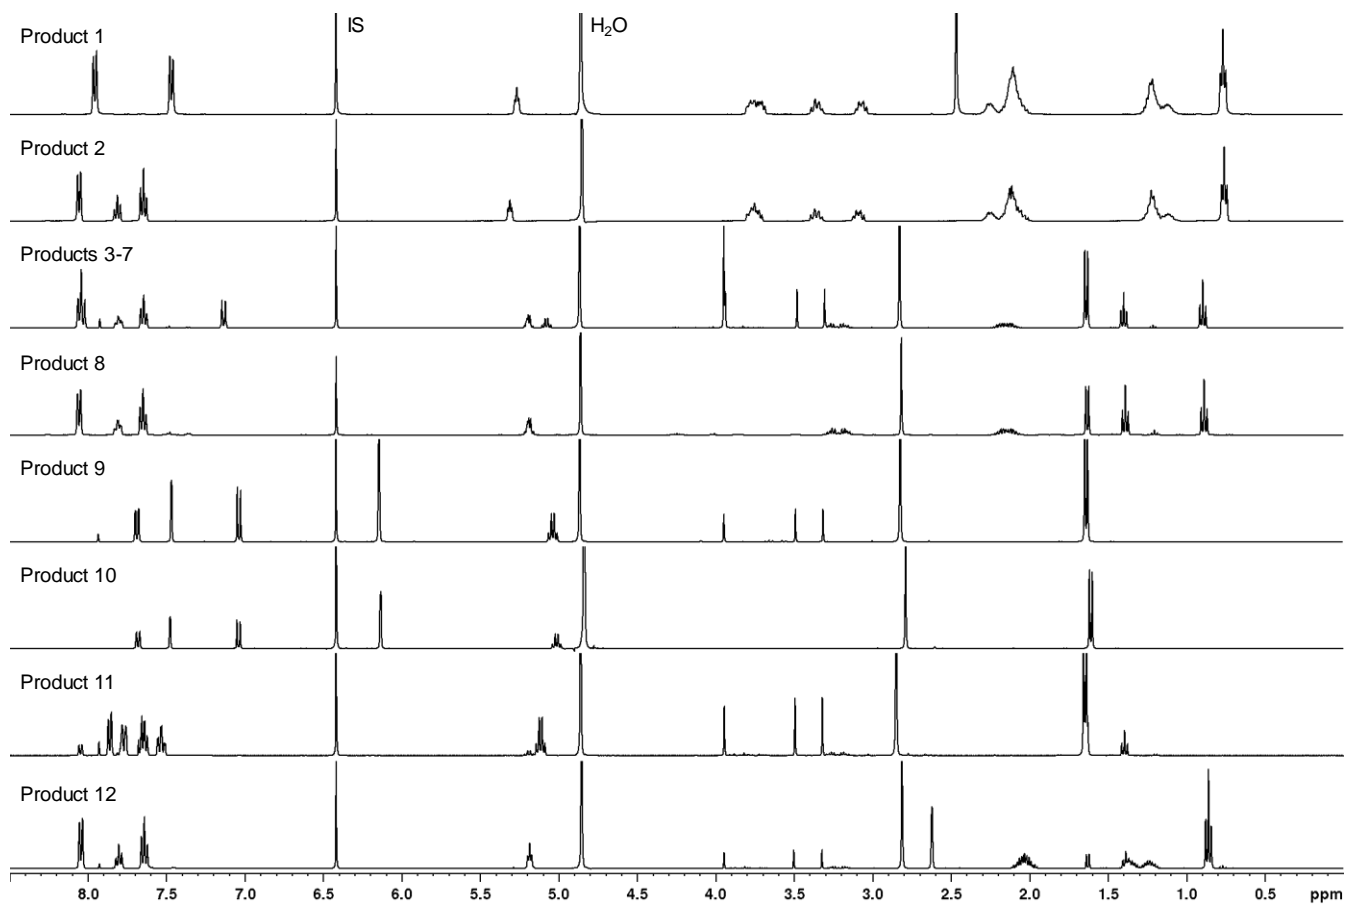

Figure S4. <sup>1</sup>H NMR spectra of seized products.

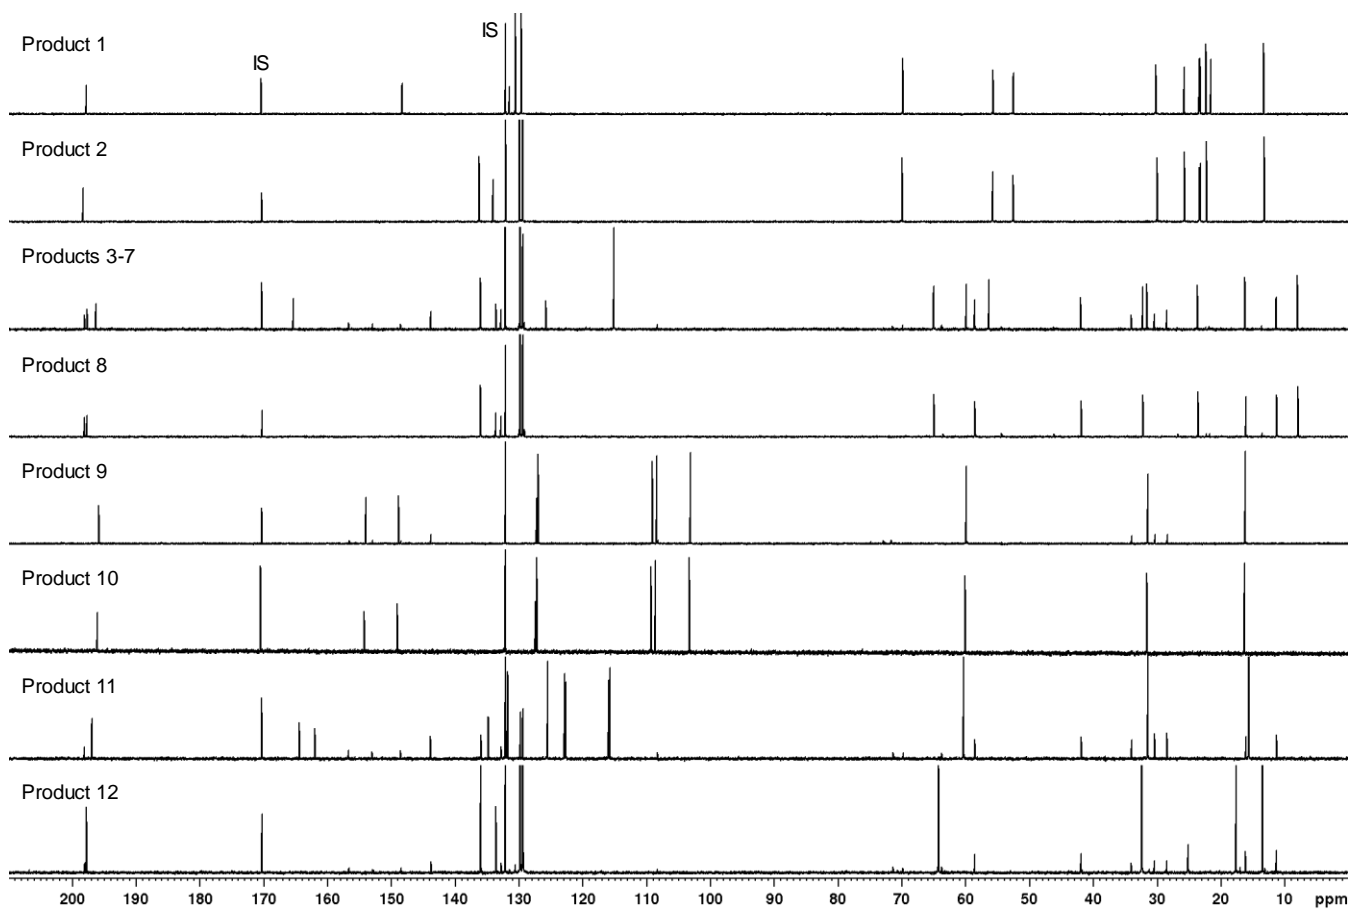

Figure S5.  $^{13}\text{C}$  NMR spectra of seized products.

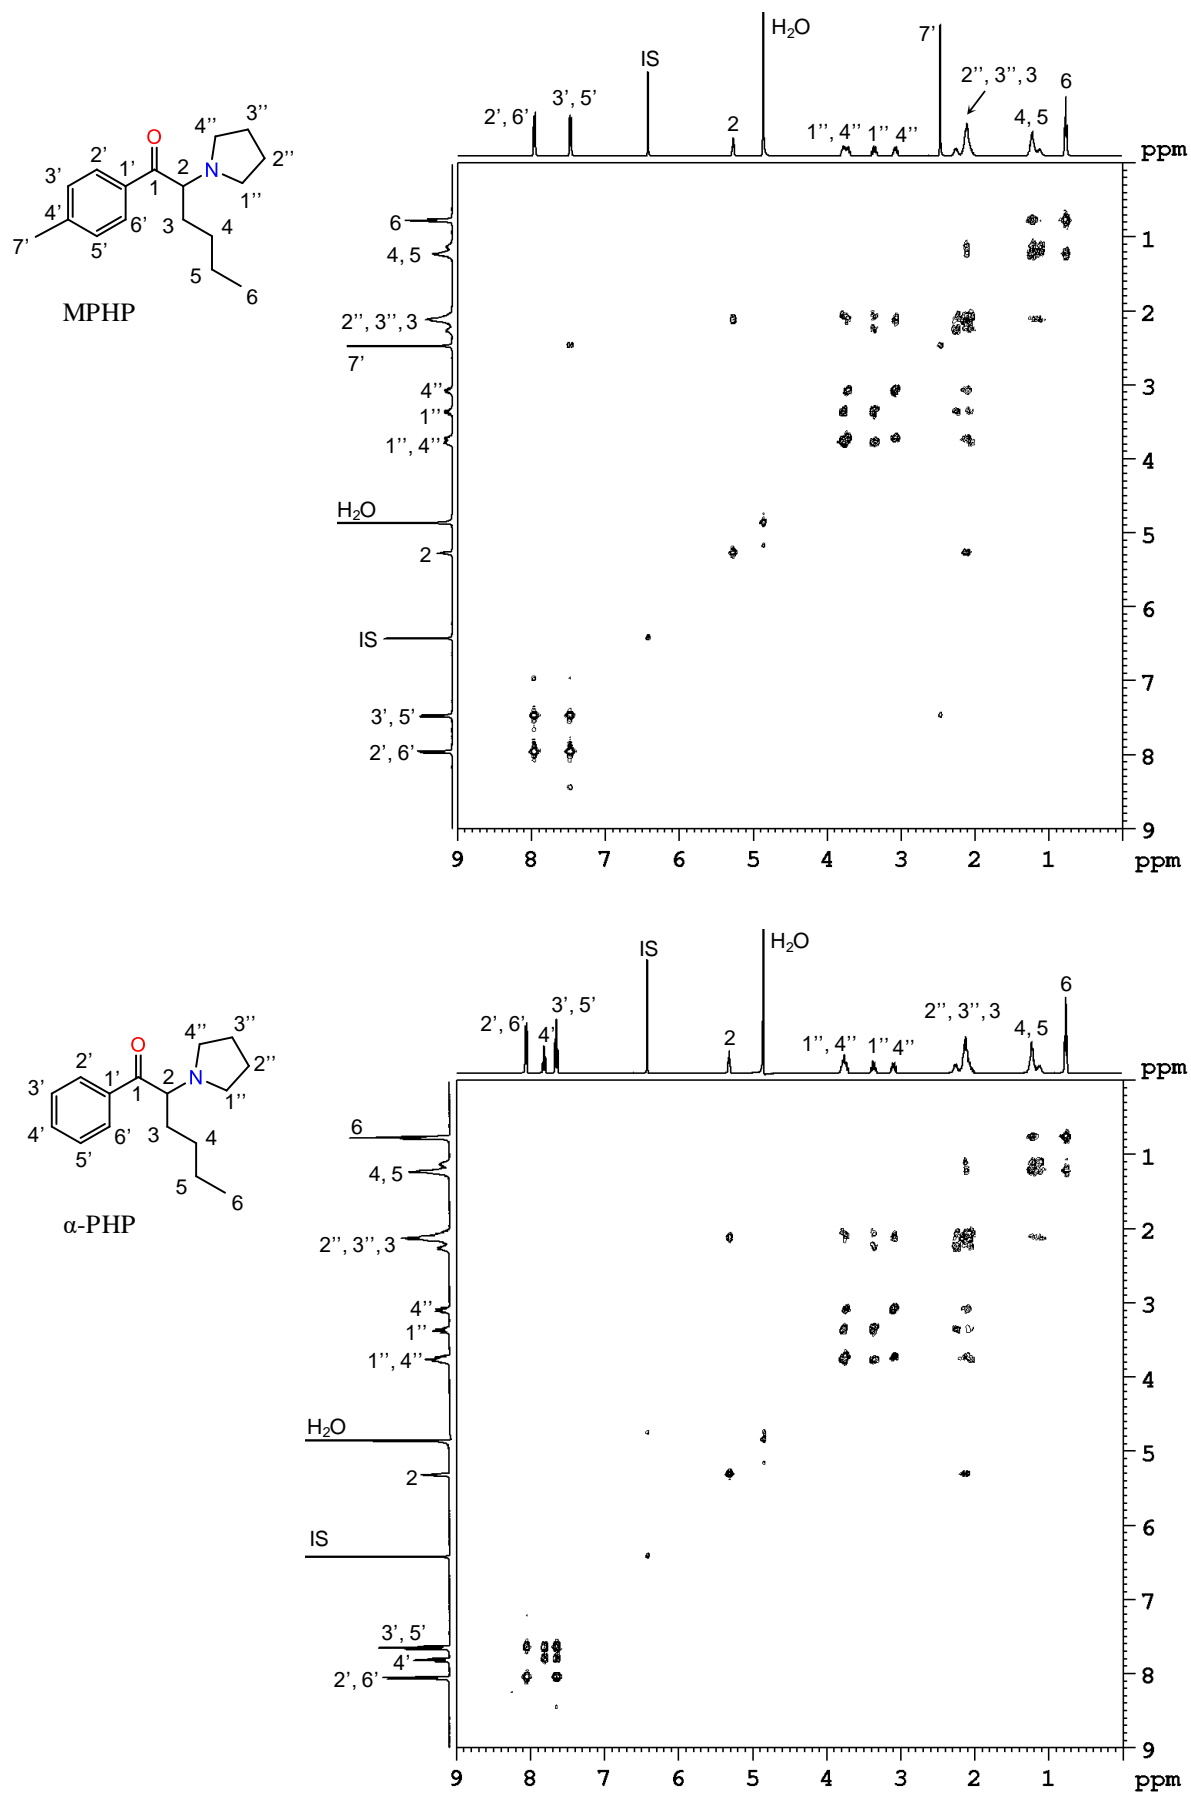

Figure S6.  $^1\text{H}$ - $^1\text{H}$  COSY NMR spectra of MPHP and  $\alpha$ -PHP found in products 1 and 2, respectively .

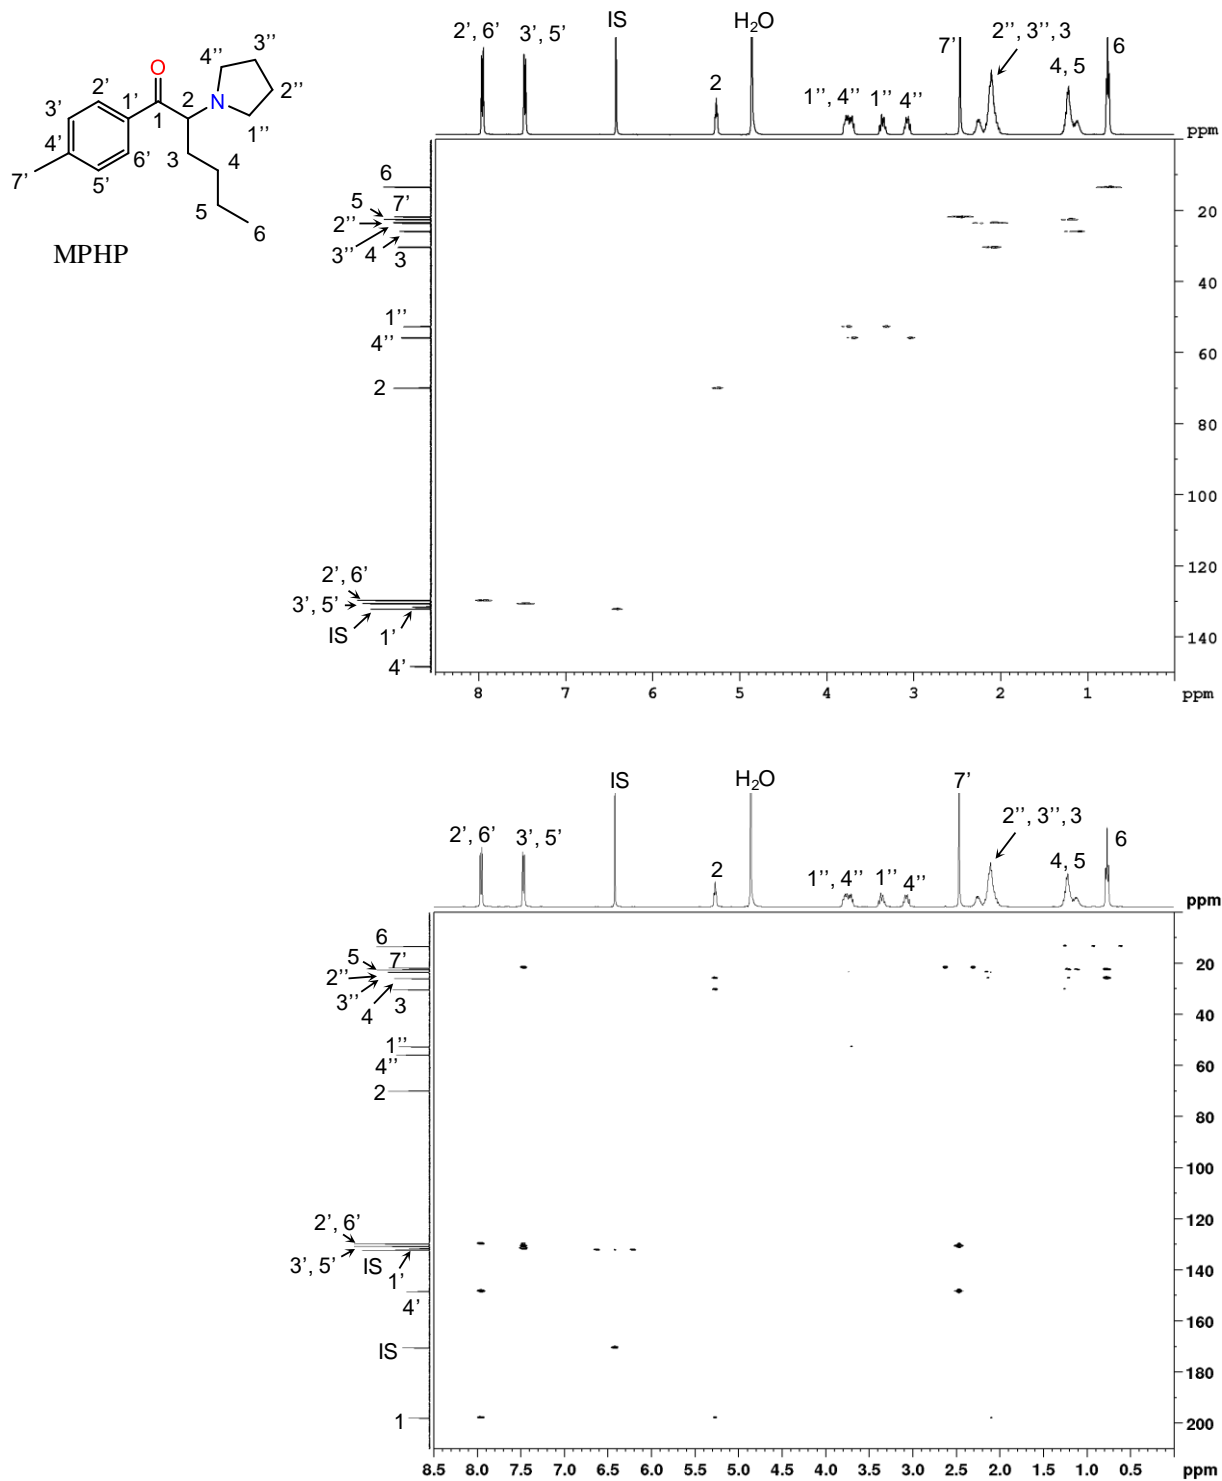

**Figure S7.**  $^1\text{H}$ - $^{13}\text{C}$  HSQC and HMBC NMR spectra of MPHP found in product 1.



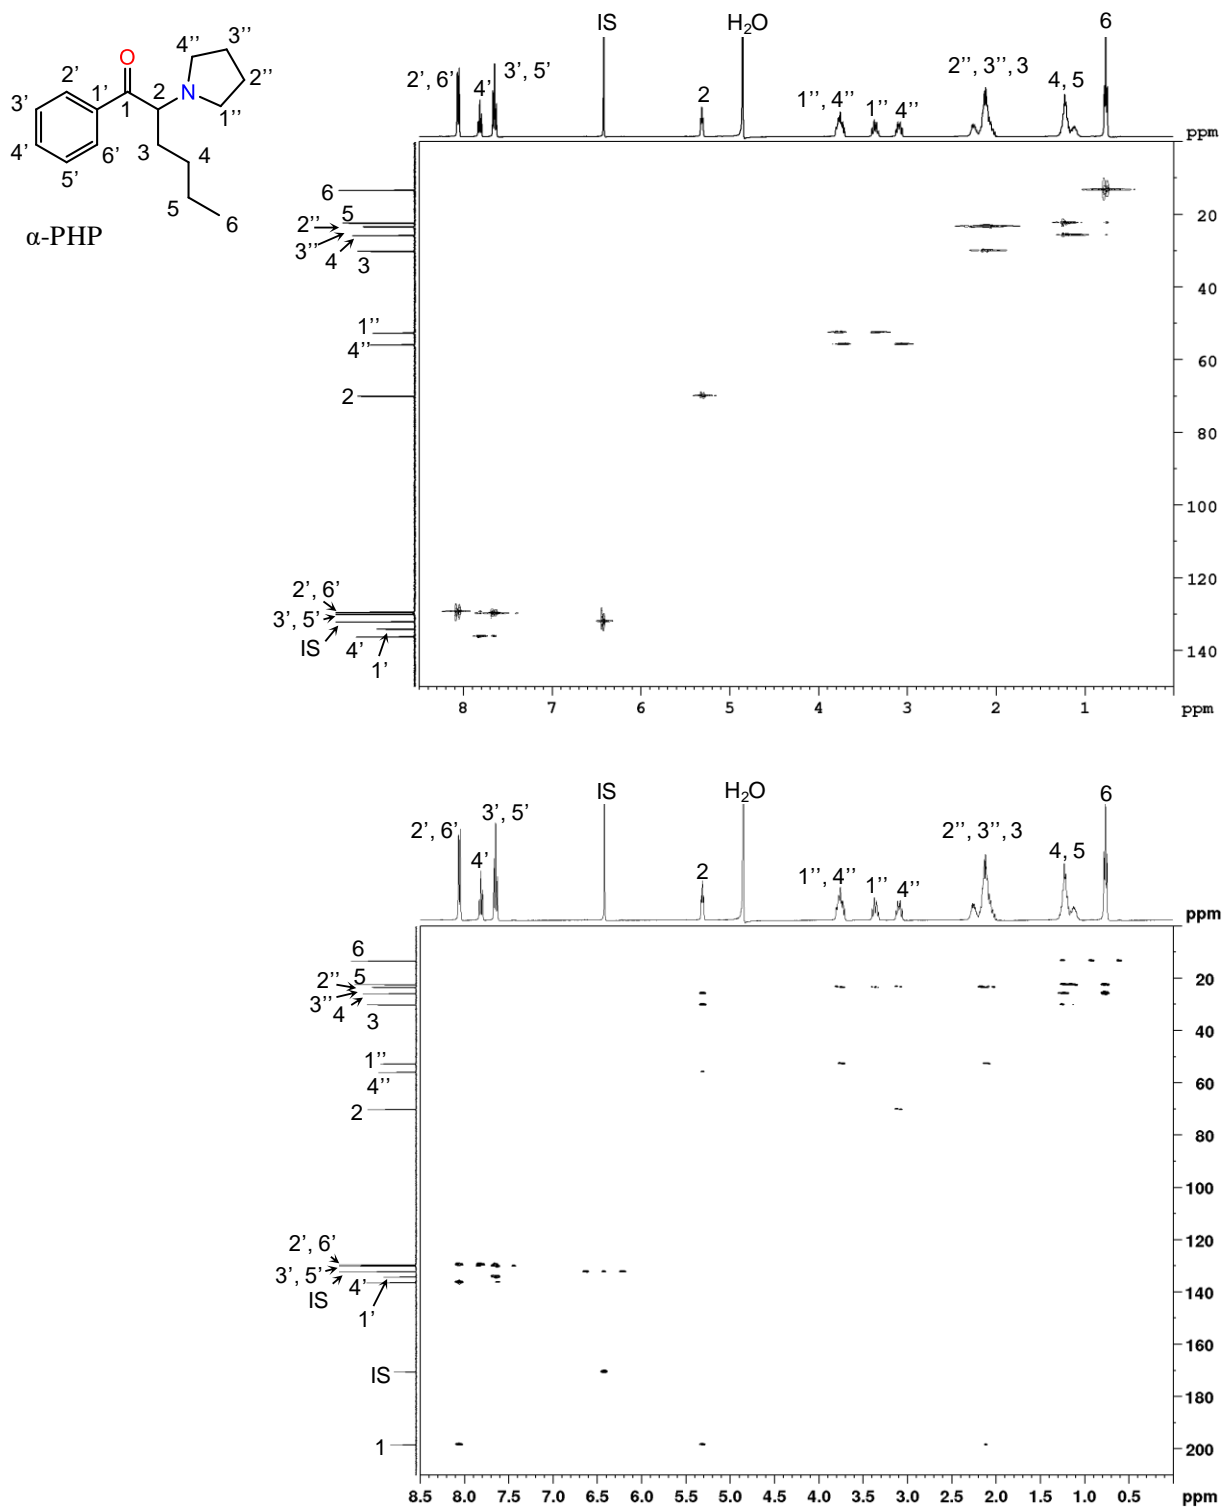

Figure S8.  $^1\text{H}$ - $^{13}\text{C}$  HSQC and HMBC NMR spectra of  $\alpha$ -PHP found in product 2.

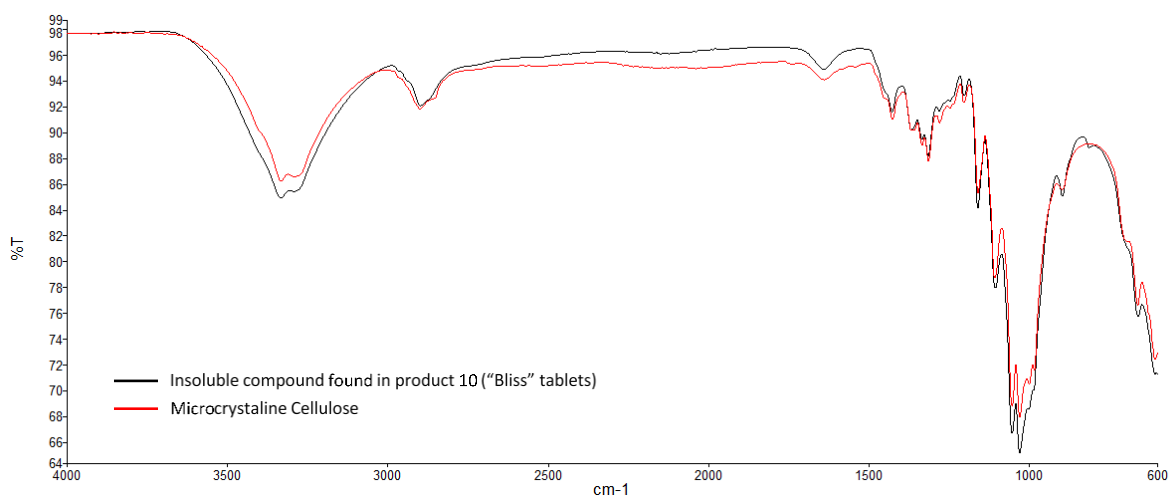

**Figure S9.** Comparison of the FTIR spectra of the insoluble substance found in product 10 (“Bliss” tablets) with microcrystalline cellulose.

From Figure S9, it was possible to notice the following characteristics: the absorbance peaks in the 3400–3300  $\text{cm}^{-1}$  regions are attributed to the stretching vibrations of the OH group. The peaks around 2900–2800  $\text{cm}^{-1}$  correspond to CH stretching. The band located at 1639  $\text{cm}^{-1}$  corresponds to vibration of water molecules adsorbed in microcellulose. The peaks observed in the range of 1420–1430  $\text{cm}^{-1}$  were attributed to the symmetric  $\text{CH}_2$  bending vibrations, while the absorbance bands at around 1030  $\text{cm}^{-1}$  and 896  $\text{cm}^{-1}$  were associated with the C-O stretching vibration and the C-H rocking vibration, respectively.

**Table S1.** <sup>1</sup>H and <sup>13</sup>C NMR assignments of adulterants found in seized materials.

| Position | 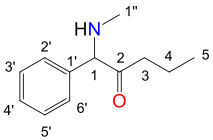<br>Isopentredone |                                                                                       | <br>Ethylphenidate |                                                                                       | <br>Caffeine |                                                                                       | <br>Methylamine |                                                                                       |
|----------|----------------------------------------------------------------------------------------------------|---------------------------------------------------------------------------------------|------------------------------------------------------------------------------------------------------|---------------------------------------------------------------------------------------|-------------------------------------------------------------------------------------------------|---------------------------------------------------------------------------------------|----------------------------------------------------------------------------------------------------|---------------------------------------------------------------------------------------|
|          | <sup>13</sup> C<br>(δ/ppm)                                                                         | <sup>1</sup> H (δ/ppm, protons,<br>multiplicity <sup>a</sup> , coupling<br>constants) | <sup>13</sup> C<br>(δ/ppm)                                                                           | <sup>1</sup> H (δ/ppm, protons,<br>multiplicity <sup>a</sup> , coupling<br>constants) | <sup>13</sup> C<br>(δ/ppm)                                                                      | <sup>1</sup> H (δ/ppm, protons,<br>multiplicity <sup>a</sup> , coupling<br>constants) | <sup>13</sup> C<br>(δ/ppm)                                                                         | <sup>1</sup> H (δ/ppm, protons,<br>multiplicity <sup>a</sup> , coupling<br>constants) |
| 1        | 69.9                                                                                               | 5.29, 1H, s                                                                           | 173.3                                                                                                | -                                                                                     | 28.6                                                                                            | 3.26, 3H, s                                                                           | 25.1                                                                                               | 2.62, 3H, s                                                                           |
| 2        | 206.8                                                                                              | -                                                                                     | 54.4                                                                                                 | 4.02, 1H, d, <i>J</i> = 9.0 Hz                                                        | 152.8                                                                                           | -                                                                                     | -                                                                                                  | -                                                                                     |
| 3        | 41.7                                                                                               | 2.56-5.52, 1H, m<br>2.47-2.38, 1H, m                                                  | -                                                                                                    | -                                                                                     | 30.5                                                                                            | 3.43, 3H, s                                                                           | -                                                                                                  | -                                                                                     |
| 4        | 16.9                                                                                               | 1.58-1.49, 3H, m                                                                      | -                                                                                                    | -                                                                                     | 148.6                                                                                           | -                                                                                     | -                                                                                                  | -                                                                                     |
| 5        | 13.0                                                                                               | 0.70, 3H, t, <i>J</i> = 7.44 Hz                                                       | -                                                                                                    | -                                                                                     | 108.0                                                                                           | -                                                                                     | -                                                                                                  | -                                                                                     |
| 6        | -                                                                                                  | -                                                                                     | -                                                                                                    | -                                                                                     | 156.3                                                                                           | -                                                                                     | -                                                                                                  | -                                                                                     |
| 7        | -                                                                                                  | -                                                                                     | -                                                                                                    | -                                                                                     | 34.2                                                                                            | 3.91, 3H, s                                                                           | -                                                                                                  | -                                                                                     |
| 8        | -                                                                                                  | -                                                                                     | -                                                                                                    | -                                                                                     | 144.0                                                                                           | 7.92, 1H, s                                                                           | -                                                                                                  | -                                                                                     |
| 1'       | 130.6                                                                                              | -                                                                                     | 133.9                                                                                                | -                                                                                     | -                                                                                               | -                                                                                     | -                                                                                                  | -                                                                                     |
| 2'       | 129.5                                                                                              | -                                                                                     | 129.2                                                                                                | 7.36, 2H, ad, <i>J</i> = 7.7 Hz                                                       | -                                                                                               | -                                                                                     | -                                                                                                  | -                                                                                     |
| 3'       | 129.6                                                                                              | All aromatic signals at 7.46-<br>7.44, 5H, m                                          | 130.0                                                                                                | 7.48, 2H, at, <i>J</i> = 6.2 Hz                                                       | -                                                                                               | -                                                                                     | -                                                                                                  | -                                                                                     |
| 4'       | 129.4                                                                                              |                                                                                       | 129.2                                                                                                | 7.44, 1H, at, <i>J</i> = 6.2 Hz                                                       | -                                                                                               | -                                                                                     | -                                                                                                  | -                                                                                     |
| 5'       | 129.6                                                                                              |                                                                                       | 130.0                                                                                                | 7.48, 2H, at, <i>J</i> = 6.2 Hz                                                       | -                                                                                               | -                                                                                     | -                                                                                                  | -                                                                                     |
| 6'       | 129.5                                                                                              |                                                                                       | 129.2                                                                                                | 7.36, 2H, ad, <i>J</i> = 7.7 Hz                                                       | -                                                                                               | -                                                                                     | -                                                                                                  | -                                                                                     |
| 1''      | 31.2                                                                                               |                                                                                       | 2.99, 3H, s                                                                                          | 58.5                                                                                  | 3.86, 2H, at, <i>J</i> = 10.2 Hz                                                                | -                                                                                     | -                                                                                                  | -                                                                                     |
| 2''      | -                                                                                                  | -                                                                                     | 26.8                                                                                                 | 1.48-1.45, 1H, m<br>1.68, 1H, m                                                       | -                                                                                               | -                                                                                     | -                                                                                                  | -                                                                                     |
| 3''      | -                                                                                                  | -                                                                                     | 21.8                                                                                                 | 1.84-1.79, 1H, m<br>1.57-1.50, 1H, m                                                  | -                                                                                               | -                                                                                     | -                                                                                                  | -                                                                                     |
| 4''      | -                                                                                                  | -                                                                                     | 22.3                                                                                                 | 1.91, 1H, d, <i>J</i> = 14.2 Hz<br>1.68, 1H, m                                        | -                                                                                               | -                                                                                     | -                                                                                                  | -                                                                                     |
| 5''      | -                                                                                                  | -                                                                                     | 46.2                                                                                                 | 3.49, 1H, bd, <i>J</i> = 12.9 Hz<br>3.10, 1H, m                                       | -                                                                                               | -                                                                                     | -                                                                                                  | -                                                                                     |
| 1'''     | -                                                                                                  | -                                                                                     | 63.6                                                                                                 | 4.29-4.20, 2H, m                                                                      | -                                                                                               | -                                                                                     | -                                                                                                  | -                                                                                     |
| 2'''     | -                                                                                                  | -                                                                                     | 13.6                                                                                                 | 1.21, 3H, t, <i>J</i> = 7.16 Hz                                                       | -                                                                                               | -                                                                                     | -                                                                                                  | -                                                                                     |

<sup>a</sup>abbreviations: s = singlet, d = doublet, t = triplet, m = multiplet, ad = apparent doublet, at = apparent triplet, bd = broad doublet.
